# Supplementary material
Source: publisher figshare collection journal article supplement (https://sage.figshare.com/ndownloader/files/14386220)
Supplement: Supplementary file 1 [file 14386220]

Supplement Table. ICD-9-CM codes of principal diagnosis, life-sustaining procedures, and palliative care consultation

| Categories                       | Diagnoses or procedures                                      | ICD-9-CM codes                                                                                                                                                                                                                                                                                                                                                                                                                                   |
|----------------------------------|--------------------------------------------------------------|--------------------------------------------------------------------------------------------------------------------------------------------------------------------------------------------------------------------------------------------------------------------------------------------------------------------------------------------------------------------------------------------------------------------------------------------------|
| Principal diagnosis              | Pancreas cancer or advanced chronic pancreas illnesses       | 157.0, 157.1, 157.2, 157.3, 157.4, 157.8, 157.9, 577.9, 789.32                                                                                                                                                                                                                                                                                                                                                                                   |
| Systemic procedures              | Intubation, mechanical ventilation, non-invasive ventilation | 96.01, 96.02, 96.03, 96.04, 96.05, 96.70, 96.71, 96.72, 93.90                                                                                                                                                                                                                                                                                                                                                                                    |
|                                  | Enteral, parenteral infusion of concentrated nutrition       | 96.6, 99.15                                                                                                                                                                                                                                                                                                                                                                                                                                      |
|                                  | Cardiopulmonary resuscitation                                | 99.60                                                                                                                                                                                                                                                                                                                                                                                                                                            |
|                                  | Transfusion                                                  | 99.00, 99.01, 99.02, 99.03, 99.04, 99.05, 99.06, 99.07, 99.08, 99.09                                                                                                                                                                                                                                                                                                                                                                             |
|                                  | Dialysis                                                     | 39.95, V45.11, V56.0                                                                                                                                                                                                                                                                                                                                                                                                                             |
| Intra-abdominal local procedures | ERCP                                                         | 51.10, 51.11, 51.14, 52.13, 52.14, 52.19, 51.84,                                                                                                                                                                                                                                                                                                                                                                                                 |
|                                  | PTBD                                                         | 51.01, 51.12, 51.43, 51.96, 51.98                                                                                                                                                                                                                                                                                                                                                                                                                |
|                                  | Endoscopy                                                    | 45.11, 45.12, 45.13, 45.14, 45.15, 45.16, 45.19, 45.21, 45.22, 45.23, 45.24, 45.25, 45.26                                                                                                                                                                                                                                                                                                                                                        |
|                                  | Paracentesis                                                 | 54.01                                                                                                                                                                                                                                                                                                                                                                                                                                            |
| Intra-abdominal surgeries        | Pancreas                                                     | 52.09, 52.22, 52.30, 52.40, 52.51, 52.52, 52.53, 52.59, 52.60, 52.70, 52.80, 52.81, 52.83, 52.84, 52.85, 52.86, 52.95, 52.96, 52.99                                                                                                                                                                                                                                                                                                              |
|                                  | Hepatobiliary tract                                          | 50.00, 50.11, 50.12, 50.13, 50.14, 50.19, 50.21, 50.22, 50.23, 50.25, 50.26, 50.29, 50.30, 50.40, 50.51, 50.59, 50.61, 50.69, 50.91, 50.92, 50.93, 50.94, 50.99, 51.02, 51.21, 51.22, 51.23, 51.24, 51.31, 51.32, 51.33, 51.34, 51.35, 51.36, 51.37, 51.39, 51.41, 51.42, 51.43, 51.49, 51.51, 51.59, 51.61, 51.62, 51.63, 51.64, 51.69, 51.71, 51.72, 51.79, 51.81, 51.82, 51.83, 51.89, 51.91, 51.89, 51.91, 51.92, 51.93, 51.94, 51.95, 51.99 |
|                                  | Laparotomy                                                   | 54.11, 54.12, 54.19, 54.21, 54.64, 54.72, 54.73, 54.74, 54.74                                                                                                                                                                                                                                                                                                                                                                                    |
| Palliative care consultation     | Palliative care consultation                                 | V66.7                                                                                                                                                                                                                                                                                                                                                                                                                                            |

Notes: ICD-9-CM, International Classification of Diseases, 9<sup>th</sup> revision, Clinical Modification; ERCP, endoscopic retrograde cholangiopancreatography; PTBD, percutaneous transhepatic biliary drainage
